# Supplementary material
Source: HighWire-hosted journal article supplement (http://www.ajnr.org/highwire/filestream/52858/field_highwire_adjunct_files/0/15-01174.pdf)
Supplement: 15-01174.pdf [file 15-01174.pdf]

**On-line Table: Baseline characteristics of aneurysms showing minor recanalization 6 months postembolization (N = 65)**

| Variables                    | No (%)                |
|------------------------------|-----------------------|
| Sex                          |                       |
| Male/female                  | 17 (26.2%)/48 (73.8%) |
| Age (yr)                     | 57.9 ± 11.0           |
| HTN                          | 39 (60.0%)            |
| DM                           | 3 (4.6%)              |
| Hyperlipidemia               | 6 (9.2%)              |
| Smoking                      | 9 (13.8%)             |
| Antiplatelet maintenance     | 35 (53.8%)            |
| Locations                    |                       |
| Anterior circulation         | 56 (86.2%)            |
| ICA                          | 16                    |
| AcomA and ACA                | 21                    |
| MCA                          | 9                     |
| PcomA                        | 10                    |
| Posterior circulation        | 9 (13.8%)             |
| Aneurysm type                |                       |
| Sidewall                     | 15 (23.1%)            |
| Bifurcation                  | 50 (76.9%)            |
| Aneurysm size                |                       |
| ≤7 mm                        | 45 (69.2%)            |
| >7 mm                        | 20 (30.8%)            |
| Presentation                 |                       |
| UIA                          | 49 (75.4%)            |
| SAH                          | 16 (24.6%)            |
| Initial occlusion            |                       |
| Successful                   | 54 (83.1%)            |
| Residual sac                 | 11 (16.9%)            |
| Depth-to-neck ratio          |                       |
| ≤1                           | 27 (41.5%)            |
| >1                           | 38 (58.5%)            |
| Aneurysm status              |                       |
| Initial                      | 48 (73.8%)            |
| Recanalized                  | 17 (26.2%)            |
| Packing density <sup>a</sup> | 32.1 ± 9.2%           |
| Stent                        | 19 (29.2%)            |
| HydroSoft coil               |                       |
| ≤50%                         | 45 (69.2%)            |
| >50%                         | 20 (30.8%)            |

**Note:**—AcomA indicates anterior communicating artery; ACA, anterior cerebral artery; PcomA, posterior communicating artery.

<sup>a</sup>Packing density estimated, except in 17 re-embolized aneurysms (second coiling).
